# Supplementary material for: Synthesis, crystal structure and second-order nonlinear optical property of a novel pentanary selenide (K3I)[InB12(InSe4)3]
Source: Royal Society of Chemistry journal article supplement (doi:10.1039/c6dt01602b), 2016-01-01
Supplement: c6dt01602b1.pdf [file c6dt01602b1.pdf]

## ***Supporting Information***

### **Synthesis, Crystal Structure and Second-Order Nonlinear Optical Property of a Novel Pentanary Selenide (K<sub>3</sub>I)[InB<sub>12</sub>(InSe<sub>4</sub>)<sub>3</sub>]**

Sheng-Ping Guo,<sup>a,b</sup> Yang Chi,<sup>b</sup> Bin-Wen Liu<sup>a</sup> and Guo-Cong Guo<sup>a,\*</sup>

*<sup>a</sup>State Key Laboratory of Structural Chemistry, Fujian Institute of Research on the Structure of Matter, Chinese Academy of Sciences, Fuzhou, Fujian 350002, China*

*<sup>b</sup>College of Chemistry and Chemical Engineering, Yangzhou University, Yangzhou 225002, China*

*Corresponding author: [gcguo@fjirsm.ac.cn](mailto:gcguo@fjirsm.ac.cn)*

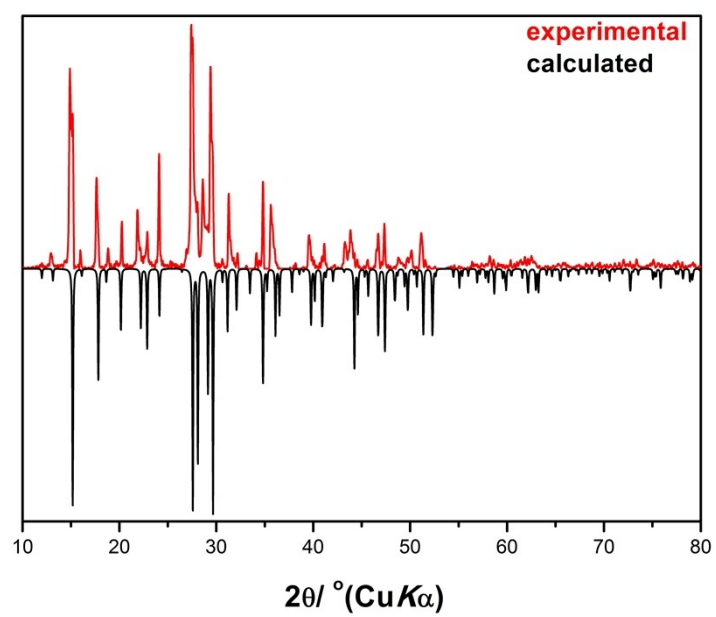

**Figure S1.** Powder X-ray diffraction pattern of  $(K_3I)[InB_{12}(InSe_4)_3]$ .

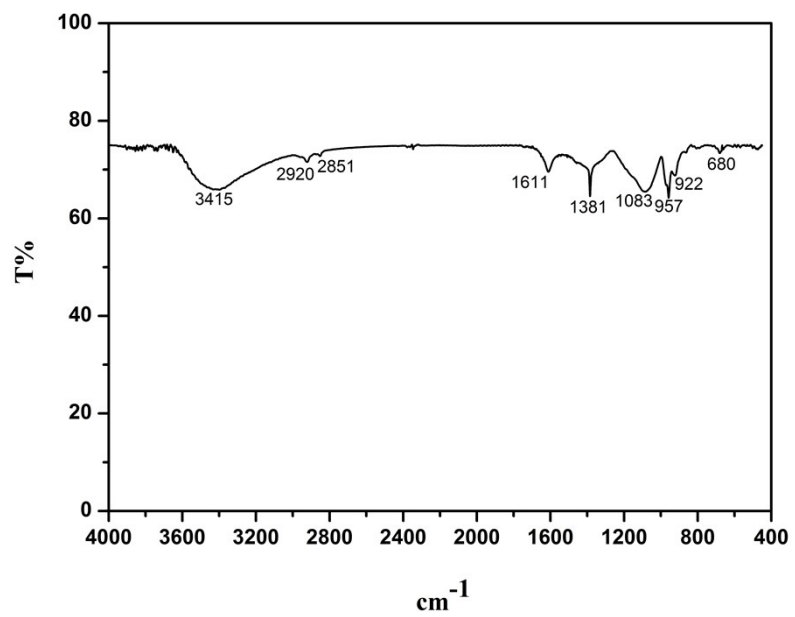

**Figure S2.** FT-IR spectrum of  $(K_3I)[InB_{12}(InSe_4)_3]$ .

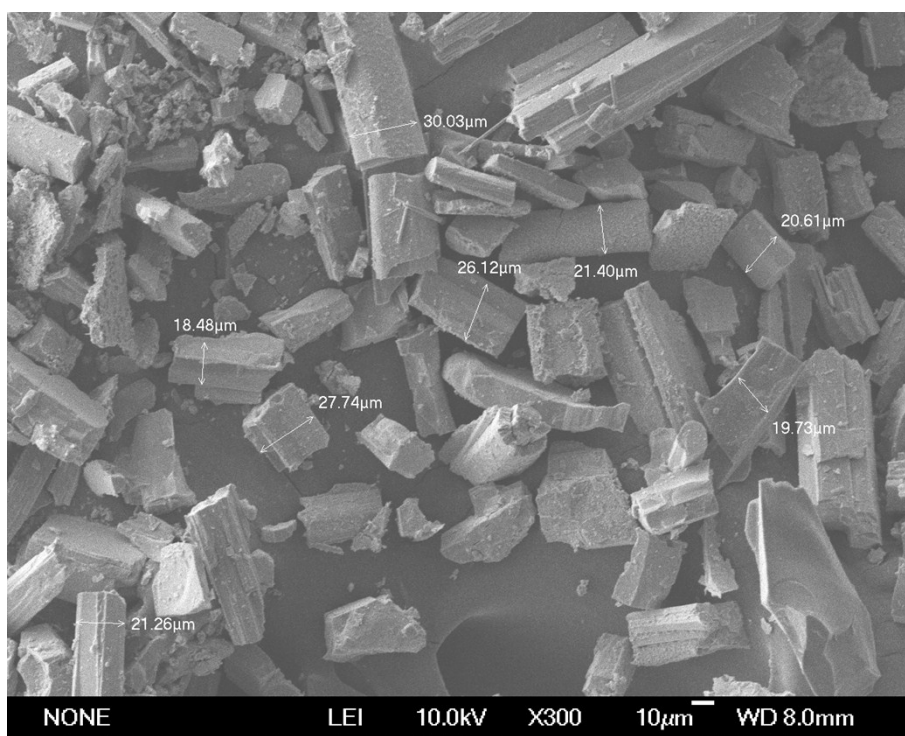

**Figure S3.** Scanning tunneling spectroscopy image of  $(K_3I)[InB_{12}(InSe_4)_3]$ .
